# Supplementary material
Source: PubMed Central journal article supplement (PMC4481326)
Supplement: NIHMS672391-supplement-1.pdf [file NIHMS672391-supplement-1.pdf]

**Supplemental Table 1. List of antibodies used in the study.**

| <b>Antigen</b>                               | <b>Clone</b>   | <b>Fluorochrome</b>               | <b>Source</b>                    | <b>Used to analyze data presented in<br/>(Note that not all antibodies are shown in figures)</b> |
|----------------------------------------------|----------------|-----------------------------------|----------------------------------|--------------------------------------------------------------------------------------------------|
| Mouse EpCAM                                  | G8.8           | APC/Cy7                           | Biologend                        | Figures 5, 8                                                                                     |
| Mouse CD45                                   | 30-F11         | PE/Cy5                            | Biologend                        | Figures 5, 8                                                                                     |
| Mouse CD45.1                                 | A20            | Pacific blue                      | Biologend                        | Figure 1                                                                                         |
| Mouse CD45.2                                 | 104            | Biotinylated                      | Pharmingen                       | Figure 1                                                                                         |
| <i>Ulea Europaeus</i><br>Agglutinin I lectin |                | Alexa 680,<br>Biotinylated        | Vector Labs,<br>In-house         | Figures 5, 8                                                                                     |
| Mouse I-A/I-E                                | M5/114.15.2    | Pacific blue, PE/Cy7              | Biologend                        | Figures 5, 8                                                                                     |
| Mouse Ly-51                                  | 6C3            | Biotinylated                      | BD Biosciences                   | Figures 5, 8                                                                                     |
| Mouse CD80                                   | 16-10A1        | APC                               | Biologend                        | Figures 5, 8                                                                                     |
| Mouse CD3                                    | 145-2C11       | Alexa 488, APC                    | Biologend                        | Figures 1, 2                                                                                     |
| Mouse TCR $\beta$                            | H57-597        | PE                                | Biologend                        | Figures 2, 4                                                                                     |
| Mouse CD4                                    | GK1.5          | PE/Cy7                            | Biologend                        | Figures 1, 2, 4                                                                                  |
| Mouse CD8                                    | 53-6.7         | PE/Cy5.5, Pacific blue            | Biologend                        | Figures 1, 2, 4                                                                                  |
| Mouse B220                                   | RA3-6B2        | PE/Cy5                            | Biologend                        | Figure 1                                                                                         |
| Mouse CD19                                   | 6D5            | PE/Cy5.5                          | Invitrogen                       | Figures 1, 2, 4                                                                                  |
| Mouse Gr1                                    | RB6-8C5        | Pacific orange                    | In-house                         | Figures 1, 2, 4                                                                                  |
| Mouse CD11b                                  | M1/70          | PE/Cy5                            | Biologend                        | Figures 1, 2, 4                                                                                  |
| Mouse CD11c                                  | HL3            | Biotinylated, APC/Cy7             | Biologend                        | Figure 1                                                                                         |
| Mouse CD62L                                  | MEL-14         | FITC, APC                         | BD Biosciences<br>In-house       | Figures 2, 4                                                                                     |
| Mouse CD44                                   | IM7            | Alexa 680                         | In-house                         | Figures 2, 4                                                                                     |
| Mouse c-Kit                                  | 2B8            | APC/Cy7                           | Biologend                        | Figure 1                                                                                         |
| Mouse CD25                                   | PC61           | Alexa 488, APC                    | Biologend                        | Figure 1                                                                                         |
| Mouse Psmb11                                 | Polyclonal     | Not applicable                    | MBL International<br>Corporation | Figure 5                                                                                         |
| Secondary antibody                           | Not applicable | Donkey anti-rabbit<br>DyLight 594 | Jackson<br>Immunoresearch        | Figure 5                                                                                         |
| Secondary antibody                           | Not applicable | Streptavidin-<br>Qdot605          | Invitrogen                       | Figure 1                                                                                         |
| Secondary antibody                           | Not applicable | Streptavidin-<br>Alexa fluor 594  | Invitrogen                       | Figure 5                                                                                         |
| Secondary antibody                           | Not applicable | Streptavidin-<br>BV605 or BV 421  | BD Biosciences                   | Figures 5, 8                                                                                     |

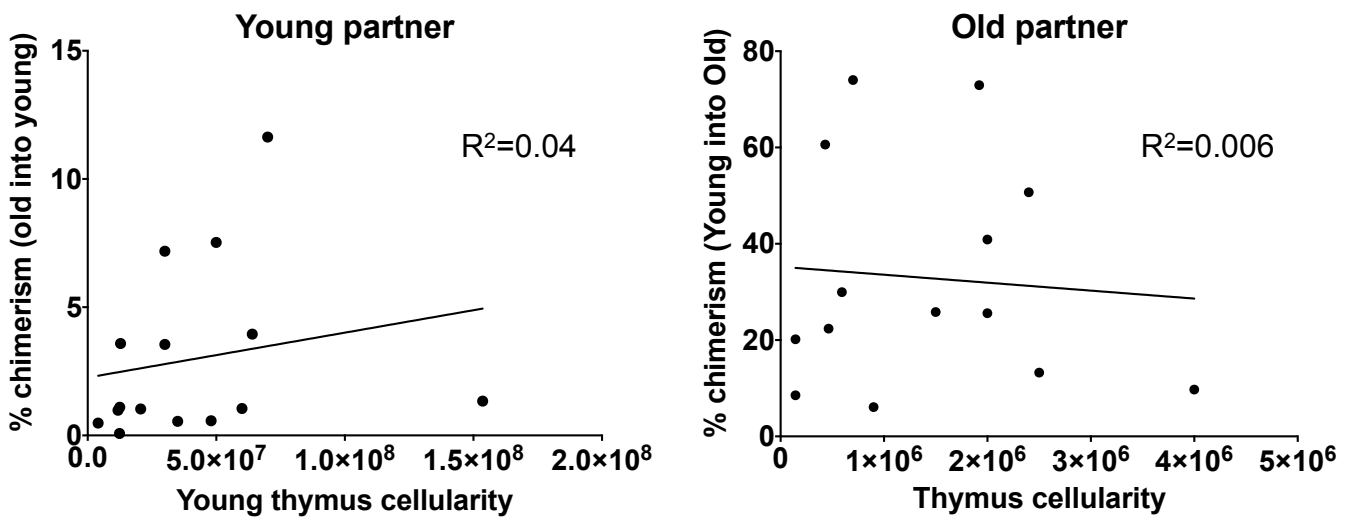

**Supplemental Figure 1. Contribution of parabiotic partner thymocytes does not correlate with thymus cellularity in heterochronic parabionts.** The contribution of partner cells to the thymus of each heterochronic parabiont (data from Figure 1B) was graphed against the total cellularity of that thymus (data from Figure 1C).

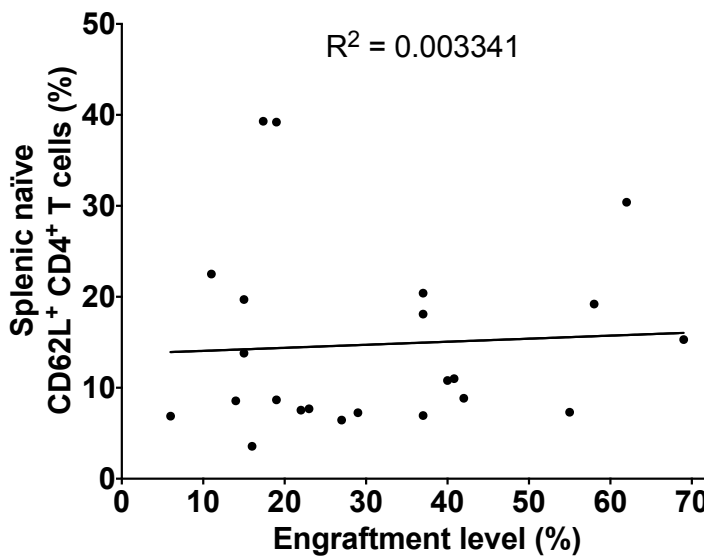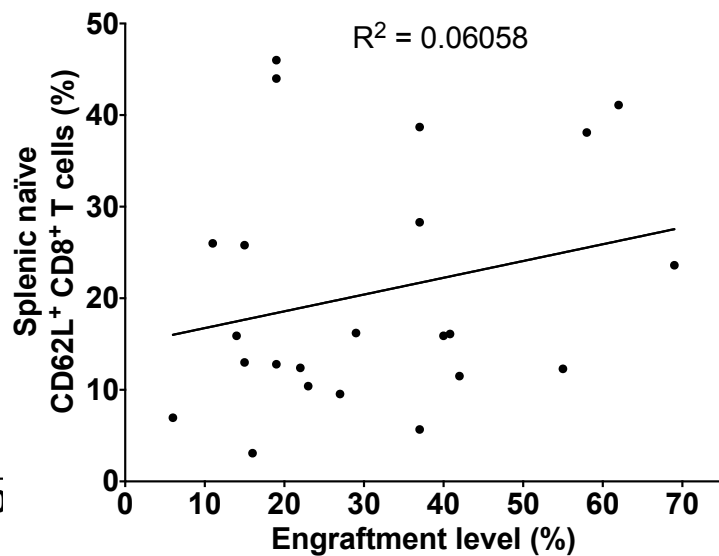

**Supplemental Figure 2. Donor cell engraftment level does not correlate with percentage of naïve splenic T cells.** Percentages of splenic naïve T cells shown in Figure 5C were compared to the engraftment levels of donor GFP<sup>+</sup> thymic cells within recipient thymuses (examples in Figure 4B). Each recipient thymus was manually scored to determine the engraftment level.
